# Supplementary material
Source: Springer Nature journal article supplement (https://www.springermedizin.de/resource/supplementary/12891_2012_1437_MOESM2_ESM.pdf/9508348)

## Appendix C:

### Job Physical Exposure Data Collection Instruments

|     |                                              |
|-----|----------------------------------------------|
| C.1 | Position Specific Data Collection Form ..... |
| C.2 | Job Specific Data Collection Form .....      |
| C.3 | Borg CR-10 Scale .....                       |
| C.4 | Grip/Pinch Diagram .....                     |
| C.5 | Hand Activity Level (HAL) Scale .....        |

# Appendix C.1: Position Specific Data Form

## Position / Worker Specific Data Form

1. Subject I.D. \_\_\_\_\_ <AA0001> 5. Facility: \_\_\_\_\_
2. Subject Name: \_\_\_\_\_ 6. Time (24hr): \_\_\_\_\_ <2:30 pm = 14:30, midnight = 00:00>
3.  Male  Female 4. Age: \_\_\_\_\_ <years> 7. Date: \_\_\_\_\_ <MM / DD / YYYY>
8. Analyst #1: \_\_\_\_\_ 9. Analyst #2: \_\_\_\_\_

### Position Information

10. Line / Department Title: \_\_\_\_\_
11. Position Title: \_\_\_\_\_
12. Position Description: \_\_\_\_\_
- \_\_\_\_\_
- \_\_\_\_\_

13. Typical Shift **Start** Time (24hr): \_\_\_\_\_ 17.         **Typical**  
M T W H F S SU **ODD WEEK**  
<Check Days Worked, Write Total Hours/Day Below>
14. Typical Shift **End** Time (24hr): \_\_\_\_\_
15. Break-Time (Minutes/day): \_\_\_\_\_ Minutes         **Typical**  
<Total of Lunch & Breaks / Day> M T W H F S SU **EVEN WEEK**  
<Check Days Worked, Write Total Hours/Day Below>
16. # of **Distinct** Jobs Rotated to: \_\_\_\_\_
18. Note Unusual Schedule Here: \_\_\_\_\_
- \_\_\_\_\_

19. Jobs Included in Position:

| Job # | Line/Cell/ Workstation | Job Title/ Description | PACE Self, Line, Piece Rate | Cycle Time (seconds) | Production per Hour | Typical Work Hrs/Day | Typical Work % of Day <input type="checkbox"/> OR <input type="checkbox"/> |
|-------|------------------------|------------------------|-----------------------------|----------------------|---------------------|----------------------|----------------------------------------------------------------------------|
| 1     |                        |                        | S L P                       |                      |                     |                      |                                                                            |
| 2     |                        |                        | S L P                       |                      |                     |                      |                                                                            |
| 3     |                        |                        | S L P                       |                      |                     |                      |                                                                            |
| 4     |                        |                        | S L P                       |                      |                     |                      |                                                                            |
| 5     |                        |                        | S L P                       |                      |                     |                      |                                                                            |
| 6     |                        |                        | S L P                       |                      |                     |                      |                                                                            |
| 7     |                        |                        | S L P                       |                      |                     |                      |                                                                            |
| 8     |                        |                        | S L P                       |                      |                     |                      |                                                                            |

Subject ID: \_\_\_\_\_

**Worker Information**

20. Prior Work Experience; Back Maximum of 10 Years **OR** Maximum of 5 Jobs<sup>1</sup>:  
 (Include Current Position and *significantly* different prior positions with *present* employer first)

| Position | Title / Description | Years | Average Borg Rating |
|----------|---------------------|-------|---------------------|
| Current  |                     |       |                     |
| Prior #1 |                     |       |                     |
| Prior #2 |                     |       |                     |
| Prior #3 |                     |       |                     |
| Prior #4 |                     |       |                     |
| Prior #5 |                     |       |                     |

21. Do you currently work on a second job outside of this facility? Yes No

22. If Yes, 2<sup>nd</sup> Job Title/Description: \_\_\_\_\_  
 \_\_\_\_\_

23. Average Hours/Week on 2<sup>nd</sup> Job: \_\_\_\_\_ 24. Number of Years on 2<sup>nd</sup> Job: \_\_\_\_\_

25. Dominant Hand Overall (Average) Borg Rating for 2<sup>nd</sup> Job: \_\_\_\_\_

26. Worker's Dominant Hand L R B (if Both, Test Right)

| Trial #1   | Trial #2 | Trial #3 | Average |
|------------|----------|----------|---------|
| kgf        | kgf      | kgf      | kgf     |
| kgf        | kgf      | kgf      | kgf     |
| kgf        | kgf      | kgf      | kgf     |
| Borg CR-10 |          |          |         |

27. Worker's Maximum **Grip** Strength (Dominant Hand, #2 Position)

28. Worker's Maximum **Lateral Pinch** Strength (Dominant Hand)

29. Worker's Maximum **3-Point Pinch** Strength (Dominant Hand)

30. Standardized Grip Force<sup>2</sup> (10 kgf) (Dominant Hand, Borg CR-10)

| Worker Estimated Rating (Stress) (Dominant Hand) | Worker Rating @ Beg/End (Stress) (Dominant Hand) |
|--------------------------------------------------|--------------------------------------------------|
|                                                  |                                                  |
|                                                  |                                                  |

31. Overall Worker Rating at **Beginning** of Shift<sup>3</sup> (Borg CR-10)

32. Overall Worker Rating at **End** of Shift<sup>3</sup> (Borg CR-10)

33. Analyst Notes (Optional): \_\_\_\_\_  
 \_\_\_\_\_  
 \_\_\_\_\_  
 \_\_\_\_\_

## Appendix C.2: Job Specific Data Collection Form

### Job Specific Data Form

1. Subject I.D. \_\_\_\_\_ 5. Facility: \_\_\_\_\_  
<From Position Form, Field #1>
2. Analyst Name(s): \_\_\_\_\_ 6. Time (24hr): \_\_\_\_\_  
<2:30 pm = 14:30, midnight = 00:00>
3. Cycle Time (minutes:seconds): \_\_\_\_\_ 7. Date: \_\_\_\_\_  
<MM / DD / YYYY>
4. Job ID (Plant Official): \_\_\_\_\_ 8. Job # (From "Position Data Form, Field #19"): \_\_\_\_\_

### Job Overview

9. Task Borg CR-10 Estimated Ratings (To Assist with Video Analysis)\*

| Task | Task Description | Average Analyst Borg CR-10 Rating |               |
|------|------------------|-----------------------------------|---------------|
|      |                  | Left (Force)                      | Right (Force) |
| 1    |                  |                                   |               |
| 2    |                  |                                   |               |
| 3    |                  |                                   |               |
| 4    |                  |                                   |               |
| 5    |                  |                                   |               |

\* Write down major tasks under "Task Description", assign typical Borg CR-10 ratings for hand(s) involved for each task

### Video Observation (Remind worker: "I will focus on your hands & arms.")

### Direct Observation (Worker Remains Working.)

| 10. Average Hand/Arm Vibration Exposure,<br>(Circle Level(s) if Present, Indicate % of Cycle<br>Time for <b>EACH</b> Level) | Left Hand |         |        | Right Hand |         |        |
|-----------------------------------------------------------------------------------------------------------------------------|-----------|---------|--------|------------|---------|--------|
|                                                                                                                             | Neg.      | Visible | Severe | Neg.       | Visible | Severe |
|                                                                                                                             | ____%     | ____%   | ____%  | ____%      | ____%   | ____%  |

| 11. Gloves<br>(Indicate Type & Fit for <b>BOTH</b> Hands) | Left Hand                                                                                                                                                                                                                                                                                                                                 |                                                                                                             | Right Hand                                                                                                                                                                                                                                                                                                                                |                                                                                                             |
|-----------------------------------------------------------|-------------------------------------------------------------------------------------------------------------------------------------------------------------------------------------------------------------------------------------------------------------------------------------------------------------------------------------------|-------------------------------------------------------------------------------------------------------------|-------------------------------------------------------------------------------------------------------------------------------------------------------------------------------------------------------------------------------------------------------------------------------------------------------------------------------------------|-------------------------------------------------------------------------------------------------------------|
|                                                           | <input type="checkbox"/> NONE<br><input type="checkbox"/> Vinyl<br><input type="checkbox"/> Latex<br><input type="checkbox"/> Cotton<br><input type="checkbox"/> Tipless<br><input type="checkbox"/> Cut-Resistant<br><input type="checkbox"/> Anti-Vibration<br><input type="checkbox"/> Leather<br><input type="checkbox"/> Other _____ | <input type="checkbox"/> Tight<br><br><input type="checkbox"/> Normal<br><br><input type="checkbox"/> Loose | <input type="checkbox"/> NONE<br><input type="checkbox"/> Vinyl<br><input type="checkbox"/> Latex<br><input type="checkbox"/> Cotton<br><input type="checkbox"/> Tipless<br><input type="checkbox"/> Cut Resistant<br><input type="checkbox"/> Anti-Vibration<br><input type="checkbox"/> Leather<br><input type="checkbox"/> Other _____ | <input type="checkbox"/> Tight<br><br><input type="checkbox"/> Normal<br><br><input type="checkbox"/> Loose |

| 12. Room Temperature: _____°C                                                                                                | Left Hand                                                        |        | Right Hand                                                       |        |
|------------------------------------------------------------------------------------------------------------------------------|------------------------------------------------------------------|--------|------------------------------------------------------------------|--------|
|                                                                                                                              |                                                                  | ____°C | <input type="checkbox"/> Not Applicable                          | ____°C |
| 13. Hand Contact with Hot/Cold Objects<br>(Indicate Temperature, % of Cycle<br>Time and Use of Gloves for <b>BOTH</b> Hands) | Gloves: <input type="checkbox"/> Yes <input type="checkbox"/> No |        | Gloves: <input type="checkbox"/> Yes <input type="checkbox"/> No |        |
|                                                                                                                              | ____% of Cycle in Contact                                        |        | ____% of Cycle in Contact                                        |        |

Job # \_\_\_\_-1

Form #: 12082003

Subject I.D. \_\_\_\_\_ Job # (From "Personal Data Form, Field #19"): \_\_\_\_\_

14. Localized Mechanical Compression (Determine Severity on Site):

|              | Negligible | Left              |                                   | Negligible | Moderate / Severe | Right                             |                            |
|--------------|------------|-------------------|-----------------------------------|------------|-------------------|-----------------------------------|----------------------------|
|              |            | Moderate / Severe | Exertions/cycle % of Cycle        |            |                   | Moderate / Severe                 | Exertions/cycle % of Cycle |
| a. Palm      |            | M S               | Ex/Cycle: _____ % of Cycle: _____ |            | M S               | Ex/Cycle: _____ % of Cycle: _____ |                            |
| b. Wrist     |            | M S               | Ex/Cycle: _____ % of Cycle: _____ |            | M S               | Ex/Cycle: _____ % of Cycle: _____ |                            |
| c. Forearm   |            | M S               | Ex/Cycle: _____ % of Cycle: _____ |            | M S               | Ex/Cycle: _____ % of Cycle: _____ |                            |
| d. Elbow     |            | M S               | Ex/Cycle: _____ % of Cycle: _____ |            | M S               | Ex/Cycle: _____ % of Cycle: _____ |                            |
| e. Finger(s) |            | M S               | Ex/Cycle: _____ % of Cycle: _____ |            | M S               | Ex/Cycle: _____ % of Cycle: _____ |                            |

**Worker Ratings** (Final Interaction with Worker for this Job)

15. Hand / Wrist / Forearm / Elbow Force Measures:

| Variables                                                                                                                                                                | Not Applicable | Typical Overall Exposure |       | Typical Peak Exposure |       |
|--------------------------------------------------------------------------------------------------------------------------------------------------------------------------|----------------|--------------------------|-------|-----------------------|-------|
|                                                                                                                                                                          |                | Left                     | Right | Left                  | Right |
| a. Weight of Workpiece(s) or tool(s) <kg> (supported by worker)                                                                                                          |                | kg                       | kg    | kg                    | kg    |
| b. Center of Mass Offset, <inches> (Measure from Center of Grip)                                                                                                         |                | in                       | in    | in                    | in    |
| c. Matching Grip Force <sup>4</sup> , <kgf> (Dominant Hand Only)                                                                                                         |                | kgf                      | kgf   | kgf                   | kgf   |
| d. Matching Pinch Force <sup>5</sup> , <kgf> Typical Pinch Type:<br><input type="checkbox"/> Lateral, <input type="checkbox"/> 2-Point, <input type="checkbox"/> 3-Point |                | kgf                      | kgf   | kgf                   | kgf   |
| e. Matching Thrust Force <sup>6</sup> , <kgf>                                                                                                                            |                | kgf                      | kgf   | kgf                   | kgf   |
| f. Pushing Force, <kgf> (Analyst Measured)                                                                                                                               |                | kgf                      | kgf   | kgf                   | kgf   |
| g. Pulling Force, <kgf> (Analyst Measured)                                                                                                                               |                | kgf                      | kgf   | kgf                   | kgf   |
| h. Analyst Rating of Applied Force <sup>7,*</sup> (Borg CR-10, Entire Job)                                                                                               |                | CR-10                    | CR-10 | CR-10                 | CR-10 |
| i. Worker Rating of Applied Force <sup>7,*</sup> (Borg CR-10, Entire Job)                                                                                                |                | CR-10                    | CR-10 | CR-10                 | CR-10 |

\* Typical Stress Level Across **ALL** Sub-Tasks for **One** Cycle

Job # \_\_\_\_\_-2

Form #: 12082003

Subject I.D. \_\_\_\_\_ Job # (From "Personal Data Form, Field #19"): \_\_\_\_\_

**Analysis from Video** (Performed outside the plant):

16. Tool Kicks and Hand as Hammer:

|                   | Negligible | Left<br>Number/Cycle @ Each Severity Level |        | Negligible | Right<br>Number/Cycle @ Each Severity Level |        |
|-------------------|------------|--------------------------------------------|--------|------------|---------------------------------------------|--------|
|                   |            | Moderate<br>(Visible)                      | Severe |            | Moderate<br>(Visible)                       | Severe |
| a. Tool Kicks     |            |                                            |        |            |                                             |        |
| b. Hand as Hammer |            |                                            |        |            |                                             |        |

| 17. HAL Rating, Hand/Wrist Posture, Forearm Rotations (All Measurements Taken from Video)               | Typical Exposure % |                |            |            | Typical Exposure Counts (Circle Peak Force Posture) |   |           |   |            |   |   |   |
|---------------------------------------------------------------------------------------------------------|--------------------|----------------|------------|------------|-----------------------------------------------------|---|-----------|---|------------|---|---|---|
|                                                                                                         | Left Hand          |                |            | Right Hand |                                                     |   | Left Hand |   | Right Hand |   |   |   |
| a. HAL Rating                                                                                           |                    |                |            |            |                                                     |   |           |   |            |   |   |   |
| b. Hand/Wrist Posture<br>(From <b>Anatomical</b> Neutral, Measured in degrees)                          |                    |                |            |            |                                                     |   |           |   |            |   |   |   |
| I. Flexion<br>(Totals 100% of Cycle)                                                                    | Low<br><30°        | Med<br>30°-50° | Hi<br>>50° | L          | M                                                   | H | L         | M | H          | L | M | H |
| II. Extension<br>(Totals 100% of Cycle)                                                                 | Low<br><30°        | Med<br>30°-50° | Hi<br>>50° | L          | M                                                   | H | L         | M | H          | L | M | H |
| III. Ulnar Deviation<br>(Totals 100% of Cycle)                                                          | Low<br><10°        | Med<br>10°-25° | Hi<br>>25° | L          | M                                                   | H | L         | M | H          | L | M | H |
| IV. Radial Deviation<br>(Totals 100% of Cycle)                                                          | Low<br><5°         | Hi<br>≥5°      |            | L          | H                                                   |   | L         | H |            | L | H |   |
| c. Number of Forearm Rotations per Cycle<br>(Measure rotations ≥ ±45°, return to neutral is 1 rotation) |                    |                |            |            |                                                     |   |           |   |            |   |   |   |

18. Exertions with Elbow Included Angle <70°  or >135°   
(Record exertions / cycle, % of cycle, and typical forearm rotation during exertion):

|                                                         | Negligible | Left                                                                                |                                                                                     |  | Negligible                                                                          | Right                                                                               |                                                                                     |  |
|---------------------------------------------------------|------------|-------------------------------------------------------------------------------------|-------------------------------------------------------------------------------------|--|-------------------------------------------------------------------------------------|-------------------------------------------------------------------------------------|-------------------------------------------------------------------------------------|--|
|                                                         |            | <70°                                                                                | >135°                                                                               |  |                                                                                     | <70°                                                                                | >135°                                                                               |  |
| a. Number of Exertions                                  |            | ____ / Cycle                                                                        | ____ / Cycle                                                                        |  |                                                                                     | ____ / Cycle                                                                        | ____ / Cycle                                                                        |  |
| b. % of Cycle Time                                      |            | ____ %                                                                              | ____ %                                                                              |  |                                                                                     | ____ %                                                                              | ____ %                                                                              |  |
| c. Typical Forearm Position<br>(Neutral, Prone, Supine) |            | N P S<br><input type="checkbox"/> <input type="checkbox"/> <input type="checkbox"/> | N P S<br><input type="checkbox"/> <input type="checkbox"/> <input type="checkbox"/> |  | N P S<br><input type="checkbox"/> <input type="checkbox"/> <input type="checkbox"/> | N P S<br><input type="checkbox"/> <input type="checkbox"/> <input type="checkbox"/> | N P S<br><input type="checkbox"/> <input type="checkbox"/> <input type="checkbox"/> |  |

Job # \_\_\_\_-3

Form #: 12082003

Subject I.D. \_\_\_\_\_ Job # (From "Personal Data Form, Field #19"): \_\_\_\_\_

19. Grip & Pinch Exertions for a Typical Cycle (Record % of cycle, and Grip or Pinch Span (≈ inches)):

| Type of Grasp<br>(Indicate: % of Cycle & Grip or Pinch Span) | Negligible | Left       |                    | Negligible | Right      |                    |
|--------------------------------------------------------------|------------|------------|--------------------|------------|------------|--------------------|
|                                                              |            | % of Cycle | ≈ Grip/Pinch Span* |            | % of Cycle | ≈ Grip/Pinch Span* |
| a. Power/Hook Grip                                           |            |            | inches             |            |            | inches             |
| b. Oblique Grip                                              |            |            | inches             |            |            | inches             |
| c. Palmer Grip                                               |            |            | inches             |            |            | inches             |
| d. Palmer Pinch                                              |            |            | inches             |            |            | inches             |
| e. 3-Point Pinch                                             |            |            | inches             |            |            | inches             |
| f. 2-Point Pinch                                             |            |            | inches             |            |            | inches             |
| g. Lateral (Key) Pinch                                       |            |            | inches             |            |            | inches             |
| h. 2-Finger "Scissor" Pinch                                  |            |            | inches             |            |            | inches             |

**Strain Index Analysis from Video:**

\* Approximate actual span from video observation; for spans less than ~¼ inch, put 0 for Grip/Pinch Span.

20. Total Cycle Time = \_\_\_\_\_ Seconds (As Timed at Plant, or From Video)

21. **LEFT** Hand Strain Index Table:

| Task | Task Description | Time | Intensity of Exertion<br>(Borg CR-10) | Number of Exertions / Cycle | Hand/Wrist Posture<br>(SI Definition) | Duration of Exertion per Cycle | Speed<br>(SI Definition) | Hours / Day |
|------|------------------|------|---------------------------------------|-----------------------------|---------------------------------------|--------------------------------|--------------------------|-------------|
| 1    |                  |      |                                       |                             |                                       |                                |                          |             |
| 2    |                  |      |                                       |                             |                                       |                                |                          |             |
| 3    |                  |      |                                       |                             |                                       |                                |                          |             |
| 4    |                  |      |                                       |                             |                                       |                                |                          |             |
| 5    |                  |      |                                       |                             |                                       |                                |                          |             |
| 6    |                  |      |                                       |                             |                                       |                                |                          |             |
| 7    |                  |      |                                       |                             |                                       |                                |                          |             |
| 8    |                  |      |                                       |                             |                                       |                                |                          |             |
| 9    |                  |      |                                       |                             |                                       |                                |                          |             |
| 10   |                  |      |                                       |                             |                                       |                                |                          |             |
| 11   |                  |      |                                       |                             |                                       |                                |                          |             |
| 12   |                  |      |                                       |                             |                                       |                                |                          |             |
| 13   |                  |      |                                       |                             |                                       |                                |                          |             |
| 14   |                  |      |                                       |                             |                                       |                                |                          |             |
| 15   |                  |      |                                       |                             |                                       |                                |                          |             |

Job # \_\_\_\_\_-4

Form #: 12082003

Subject I.D. \_\_\_\_\_ Job # (From "Personal Data Form, Field #19"): \_\_\_\_\_

22. **RIGHT** Hand Strain Index Table:

| Task | Task Description | Time | Intensity of Exertion<br>(Borg CR-10) | Number of Exertions /<br><b>Cycle</b> | Hand/Wrist Posture<br>(SI Definition) | Duration of Exertion per <b>Cycle</b> | Speed<br>(SI Definition) | Hours / Day |
|------|------------------|------|---------------------------------------|---------------------------------------|---------------------------------------|---------------------------------------|--------------------------|-------------|
| 1    |                  |      |                                       |                                       |                                       |                                       |                          |             |
| 2    |                  |      |                                       |                                       |                                       |                                       |                          |             |
| 3    |                  |      |                                       |                                       |                                       |                                       |                          |             |
| 4    |                  |      |                                       |                                       |                                       |                                       |                          |             |
| 5    |                  |      |                                       |                                       |                                       |                                       |                          |             |
| 6    |                  |      |                                       |                                       |                                       |                                       |                          |             |
| 7    |                  |      |                                       |                                       |                                       |                                       |                          |             |
| 8    |                  |      |                                       |                                       |                                       |                                       |                          |             |
| 9    |                  |      |                                       |                                       |                                       |                                       |                          |             |
| 10   |                  |      |                                       |                                       |                                       |                                       |                          |             |
| 11   |                  |      |                                       |                                       |                                       |                                       |                          |             |
| 12   |                  |      |                                       |                                       |                                       |                                       |                          |             |
| 13   |                  |      |                                       |                                       |                                       |                                       |                          |             |
| 14   |                  |      |                                       |                                       |                                       |                                       |                          |             |
| 15   |                  |      |                                       |                                       |                                       |                                       |                          |             |

23. **Comments & Observations (Risk Factors and Concerns not Otherwise Recorded):**



# Borg CR-10

|            |                         |
|------------|-------------------------|
| <b>0.5</b> | <b>Very, Very Light</b> |
| <b>1</b>   | <b>Very Light</b>       |
| <b>2</b>   | <b>Light</b>            |
| <b>3</b>   | <b>Moderate</b>         |
| <b>4</b>   | <b>Somewhat Hard</b>    |
| <b>5</b>   | <b>Hard</b>             |
| <b>6</b>   |                         |
| <b>7</b>   | <b>Very Hard</b>        |
| <b>8</b>   |                         |
| <b>9</b>   |                         |
| <b>10</b>  | <b>Near Maximal</b>     |

## Grip & Pinch Exertions Job Specific Form

|                                                                                     |                                             |                                                                                       |
|-------------------------------------------------------------------------------------|---------------------------------------------|---------------------------------------------------------------------------------------|
|   |                                             | #19a: Power Grip                                                                      |
|    | #19a: Hook Grip<br>Thumb is <b>NOT</b> Used |     |
|  | #19c: Palmer Grip                           |   |
|                                                                                     | #19d: Palmer Pinch                          |  |
|  | #19f: 2-Point Pinch                         |   |
|                                                                                     | #19g: Lateral Pinch                         |                                                                                       |

# Grip & Pinch Strength Testing Position Specific Form

---

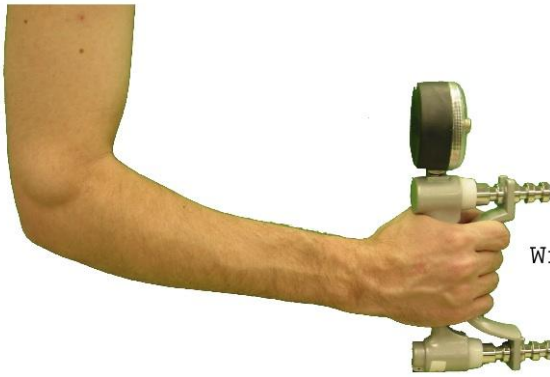

## #27 Power Grip

Wrist Posture: Functional Neutral

Shoulder Angle: 0°

Elbow Angle: 90°

---

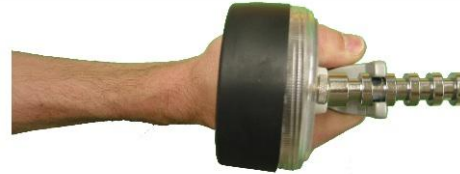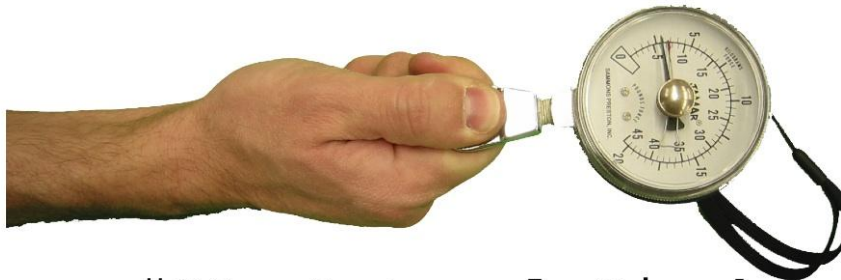

## #28: Lateral Pinch

Wrist Posture: Functional Neutral

Use: Thumb, Side of Index Finger

---

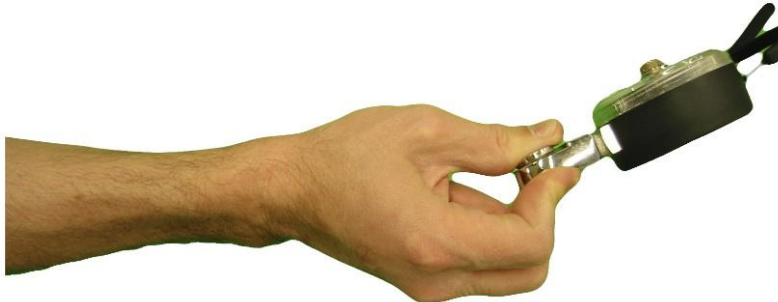

## #29: 3-Point Pinch

Wrist Posture: Functional Neutral

Use: Thumb, Index & Middle Fingers

---

## Appendix C.5: Hand Activity Level (HAL) Scale

### HAL Scale

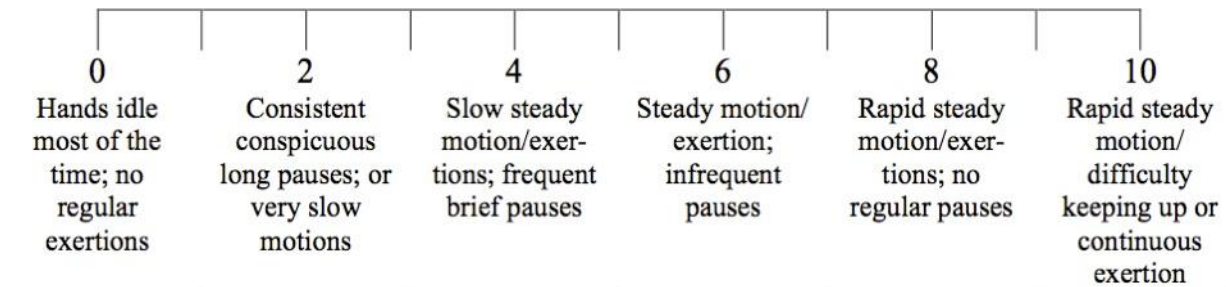

Supplement: MOESM2 [file 9508348]
